# Supplementary material for: The Complexity of Vesicle Transport Factors in Plants Examined by Orthology Search
Source: PLoS One. 2014 May 20;9(5):e97745. doi: 10.1371/journal.pone.0097745 (PMC4028247; doi:10.1371/journal.pone.0097745)
Supplement: Table S1 — Literature reference for all the yeast (co-)orthologues for the vesicular transport factors from the SGD. (XLSX) [file pone.0097745.s003.xlsx]

## Sheet: Sheet1
Table S1 -Given are the yeast accession Ids and their respective reference as per SGD (http://www.yeastgenome.org/).
COP-II	Factor	Yeast Id	PMID	Author/s	Reference
	Sec13	YLR208W	8432727	Pryer et al	J Cell Biol. 1993 Feb;120(4):865-75.
		YBR175W	11742990	Roguev et al	EMBO J. 2001 Dec 17;20(24):7137-48.	function distinct from vesicle transport
	Sec31	YDL195W	9190202	Salama et al	Mol Biol Cell. 1997 Feb;8(2):205-17.
		YJL041W	2112428	Nehrbass et al	Cell. 1990 Jun 15;61(6):979-89.	function distinct from vesicle transport
	Sec23	YPR181	8451644	Yoshihisa et al	Science. 1993 Mar 5;259(5100):1466-8.
	Sec24	YIL109C	12941277	Miller et al	Cell. 2003 Aug 22;114(4):497-509.
		YNL049C	10753972	Peng et al	J Biol Chem. 2000 Apr 14;275(15):11521-8.
	Sec12 & Sed4	YNR026C	8377826	Barlowe and Schekman	Nature. 1993 Sep 23;365(6444):347-9.
		YCR067C	7593162	Gimeno et al	J Cell Biol. 1995 Oct;131(2):325-38.
	Sar1-like	YPL218W	8419365	Barlowe et al	J Biol Chem. 1993 Jan 15;268(2):873-9.
	Sec16	YPL085W	12235121	Supek et al	J Cell Biol. 2002 Sep 16;158(6):1029-38. Epub 2002 Sep 16.
COP-I	α	YDL145C	7724544	Gerich et al	Proc Natl Acad Sci U S A. 1995 Apr 11;92(8):3229-33.
	β'	YGL137W	7929113	Duden et al	J Biol Chem. 1994 Sep 30;269(39):24486-95.
	ε	YIL076W	9463377	Duden et al	EMBO J. 1998 Feb 16;17(4):985-95.
	β	YDR238C	7929113	Duden et al	J Biol Chem. 1994 Sep 30;269(39):24486-95.
	Υ	YNL287W	11294905	Spang et al	Mol Biol Cell. 2001 Apr;12(4):1035-45.
	δ	YFR051C	8617224	Cosson et al	EMBO J. 1996 Apr 15;15(8):1792-8.
	ζ	YPL010W	8617224	Cosson et al	EMBO J. 1996 Apr 15;15(8):1792-8.
	Sec7-type	YDR170C	3042778	Achstetter et al	J Biol Chem. 1988 Aug 25;263(24):11711-7.
	GNOM-type	YEL022W	11294905	Spang et al	Mol Biol Cell. 2001 Apr;12(4):1035-45.
		YJR031C	11294905	Spang et al	Mol Biol Cell. 2001 Apr;12(4):1035-45.
	ARF1A	YDL137W	2123295	Stearbs et al	Mol Cell Biol. 1990 Dec;10(12):6690-9.
		YDL192W	2123295	Stearbs et al	Mol Cell Biol. 1990 Dec;10(12):6690-9.
	ARLB	YPL051W	9920936	Huang et al	J Biol Chem. 1999 Feb 5;274(6):3819-27.
CCVS	Heavy chain	YGL206C	3116672	Lemmon and Jones	Science. 1987 Oct 23;238(4826):504-9.
	Light chain	YGR167W	3116672	Lemmon and Jones	Science. 1987 Oct 23;238(4826):504-9.
	γ	YPR029C	9250663	Panek et al	EMBO J. 1997 Jul 16;16(14):4194-204.
	β1/2'	YKL135C	7615679	Rad et al	J Cell Sci. 1995 Apr;108 ( Pt 4):1605-15.
	μ1	YPL259C	1761056	Nakayama et al	Eur J Biochem. 1991 Dec 5;202(2):569-74.
	σ1	YLR170C	8157009	Phan et al	EMBO J. 1994 Apr 1;13(7):1706-17.
	α	YBL037W	9250663	Panek et al	EMBO J. 1997 Jul 16;16(14):4194-204.
	Υ2	YJR058C	2040623	Kirchhausen et al	J Biol Chem. 1991 Jun 15;266(17):11153-7.
	δ	YPL195W	9335339	Cowles et al	Cell. 1997 Oct 3;91(1):109-18.
	β3	YGR261C	9335339	Cowles et al	Cell. 1997 Oct 3;91(1):109-18.
	σ3	YJL024C	9335339	Cowles et al	Cell. 1997 Oct 3;91(1):109-18.
Retromers/ ESCRTs	Vps5/SNX	YJL036W	12554655	Hettema et al	EMBO J. 2003 Feb 3;22(3):548-57.
		YKR078W	9175702	Nothwehr and Hindes	J Cell Sci. 1997 May;110 ( Pt 9):1063-72.
		YOR069W	9175702	Nothwehr and Hindes	J Cell Sci. 1997 May;110 ( Pt 9):1063-72.
	Vps26	YJL053W	9700157	Seaman et al	J Cell Biol. 1998 Aug 10;142(3):665-81
	Vps29	YHR012W	9700157	Seaman et al	J Cell Biol. 1998 Aug 10;142(3):665-81
	Vps35	YJL154C	9700157	Seaman et al	J Cell Biol. 1998 Aug 10;142(3):665-81
	VPS23	YCL008C	11511343	Katzmann et al	Cell. 2001 Jul 27;106(2):145-55.
	VPS28	YPL065W	11511343	Katzmann et al	Cell. 2001 Jul 27;106(2):145-55.
	VPS22	YPL002C	15329733	Hierro et al	Nature. 2004 Sep 9;431(7005):221-5.
	VPS25	YJR102C	15329733	Hierro et al	Nature. 2004 Sep 9;431(7005):221-5.
	VPS2	YKL002W	12194857	Babst et al	Dev Cell. 2002 Aug;3(2):271-82.
	VPS20	YMR077C	12194857	Babst et al	Dev Cell. 2002 Aug;3(2):271-82.
	Vps24	YKL041W	9606181	Babst et al	EMBO J. 1998 Jun 1;17(11):2982-93.
	SNF7b/SNF7c	YLR025W	9606181	Babst et al	EMBO J. 1998 Jun 1;17(11):2982-93.
	DID2	YKR035W-A	1493335	Raymond et al	Mol Biol Cell. 1992 Dec;3(12):1389-402.
	VPS31/Bro1	YOR275C	15371534	Xu et al	Mol Biol Cell. 2004 Dec;15(12):5528-37.
	VPS4	YPR173C	12194857	Babst et al	Dev Cell. 2002 Aug;3(2):271-82.
Rab GTPases	RABA1a	YER031C	9151665	Jedd et al	J Cell Biol. 1997 May 5;137(3):563-80.
	RABA1b	YGL210W	9151665	Jedd et al	J Cell Biol. 1997 May 5;137(3):563-80.
	RABD2a	YFL038C	11879636	Morsomme and Riezman	Dev Cell. 2002 Mar;2(3):307-17.
	RABD2b
	RABD2c
	RABE1a	YFL005W	10022848	Guo et al	EMBO J. 1999 Feb 15;18(4):1071-80.
	RABE1c
	RABE1d
	RABE1e
	RABF1	YKR014C	8163546	Singer-Krüger et al	J Cell Biol. 1994 Apr;125(2):283-98.
	RABF2a	YOR089C	8163546	Singer-Krüger et al	J Cell Biol. 1994 Apr;125(2):283-98.
	RABF2b	YNL093W	8163546	Singer-Krüger et al	J Cell Biol. 1994 Apr;125(2):283-98.
	RABG2	YML001W	8308065	Schimmöller and Riezman	J Cell Sci. 1993 Nov;106 ( Pt 3):823-30.
	RABG3a
	RABG3b
	RABG3c
	RABG3d
	RABG3e
	RABG3f
	RABH1a	YLR262C	8663225	Li and Warner	J Biol Chem. 1996 Jul 12;271(28):16813-9.
	RABH1b
	RABH1c
	RABh1d
	RABH1e
	Arf1-like2	YBR164C	9388248	Lee et al	J Biol Chem. 1997 Dec 5;272(49):30998-1005.
	ArfRP1-like	YPL051W	9920936	Huang et al	J Biol Chem. 1999 Feb 5;274(6):3819-27.
	SEC1a	YDR164C	10427089	Carr et al	J Cell Biol. 1999 Jul 26;146(2):333-44.
	SEC1b
	VPS45	YGL095C	7720726	Piper et al	Eur J Cell Biol. 1994 Dec;65(2):305-18.
	VPS33	YLR396C	9624182	Gerhardt et al	J Biol Chem. 1998 Jun 19;273(25):15818-29.
	SLY1	YDR189W	12729020	Kosodo et al	Biosci Biotechnol Biochem. 2003 Feb;67(2):448-50.
Tethering factors	Uso1	YDL058W	2010462	Nakajima et al	J Cell Biol. 1991 Apr;113(2):245-60.
	COY1	YKL179C	12429822	Gillingham et al	Mol Biol Cell. 2002 Nov;13(11):3761-74.
	Rud3/Grp1	YOR216C	15504911	Gillingham et al	J Cell Biol. 2004 Oct 25;167(2):281-92.
	Imh1	YLR309C	10209125	Kier-Nielson et al	Curr Biol. 1999 Apr 8;9(7):385-8.
	Vps11	YMR231W	10978279	Srivastava et al	Genetics. 2000 Sep;156(1):105-22.
	Vps16	YPL045W	9362071	Riedr and Emr	Mol Biol Cell. 1997 Nov;8(11):2307-27.
	Vps18	YLR148W	10978279	Srivastava et al	Genetics. 2000 Sep;156(1):105-22.
	Vps33	YLR396C	10944212	Seals et al	Proc Natl Acad Sci U S A. 2000 Aug 15;97(17):9402-7.
	Vps39	YDL077C	11062257	Wurmser et al	J Cell Biol. 2000 Oct 30;151(3):551-62.
	Vps41	YDR080W	9111041	Nakamura et al	J Biol Chem. 1997 Apr 25;272(17):11344-9.
	Vps3	YDR495C	2202738	Raymond et al	J Cell Biol. 1990 Sep;111(3):877-92.
	Vps8	YAL002W	8969229	Horazdovsky et al	J Biol Chem. 1996 Dec 27;271(52):33607-15.
	Sec3	YER008C	8978675	TerBush et al	EMBO J. 1996 Dec 2;15(23):6483-94.
	Sec5	YDR166C	8978675	TerBush et al	EMBO J. 1996 Dec 2;15(23):6483-94.
	Sec6	YIL068C	8978675	TerBush et al	EMBO J. 1996 Dec 2;15(23):6483-94.
	Sec8	YPR055W	8978675	TerBush et al	EMBO J. 1996 Dec 2;15(23):6483-94.
	Sec10	YLR166C	8978675	TerBush et al	EMBO J. 1996 Dec 2;15(23):6483-94.
	Sec15	YGL233W	8978675	TerBush et al	EMBO J. 1996 Dec 2;15(23):6483-94.
	Exo70	YJL085W	8978675	TerBush et al	EMBO J. 1996 Dec 2;15(23):6483-94.
	Exo84	YBR102C	10438536	Guo et al	J Biol Chem. 1999 Aug 13;274(33):23558-64.
	Dsl1	YNL258C	11493604	Andag et al	J Biol Chem. 2001 Oct 19;276(42):39150-60.
	Tip20	YGL145W	15073376	Kamena and Spang	Science. 2004 Apr 9;304(5668):286-9.
	Sec39	YLR440C	15942868	Ishikawa et al	J Gen Appl Microbiol. 2005 Apr;51(2):73-82.
	COG1	YGL223C	12006647	Ram et al	Mol Biol Cell. 2002 May;13(5):1484-500.
	COG2	YGR120C	12006647	Ram et al	Mol Biol Cell. 2002 May;13(5):1484-500.
	COG3	YER157W	12006647	Ram et al	Mol Biol Cell. 2002 May;13(5):1484-500.
	COG4	YPR105C	12006647	Ram et al	Mol Biol Cell. 2002 May;13(5):1484-500.
	COG5	YNL051W	12006647	Ram et al	Mol Biol Cell. 2002 May;13(5):1484-500.
	COG6	YNL041C	12006647	Ram et al	Mol Biol Cell. 2002 May;13(5):1484-500.
	COG7	YGL005C	12006647	Ram et al	Mol Biol Cell. 2002 May;13(5):1484-500.
	COG8	YML071C	12006647	Ram et al	Mol Biol Cell. 2002 May;13(5):1484-500.
	VPS51	YKR020W	12686613	Conibear et al	Mol Biol Cell. 2003 Apr;14(4):1610-23.
	VPS52	YDR484W	12686613	Conibear et al	Mol Biol Cell. 2003 Apr;14(4):1610-23.
	VPS53	YJL029C	12686613	Conibear et al	Mol Biol Cell. 2003 Apr;14(4):1610-23.
	VPS54	YDR027C	12686613	Conibear et al	Mol Biol Cell. 2003 Apr;14(4):1610-23.
	Bet3	YKR068C	8590804	Rossi et al	Mol Biol Cell. 1995 Dec;6(12):1769-80.
	Bet5	YML077W	10727015	Sacher et al	Eur J Cell Biol. 2000 Feb;79(2):71-80.
	Trs20	YBR254C	10727015	Sacher et al	Eur J Cell Biol. 2000 Feb;79(2):71-80.
	Trs23	YDR246W	9564032	Sacher et al	EMBO J. 1998 May 1;17(9):2494-503.
	Trs31	YDR472W	10727015	Sacher et al	Eur J Cell Biol. 2000 Feb;79(2):71-80.
	Trs33	YOR115C	10727015	Sacher et al	Eur J Cell Biol. 2000 Feb;79(2):71-80.
	Trs85	YDR108W	16079147	Meiling-Wesse et al	J Biol Chem. 2005 Sep 30;280(39):33669-78.
	Trs65	YGR166W	10727015	Sacher et al	Eur J Cell Biol. 2000 Feb;79(2):71-80.
	Trs120	YDR407C	10727015	Sacher et al	Eur J Cell Biol. 2000 Feb;79(2):71-80.
	Trs130	YMR218C	10727015	Sacher et al	Eur J Cell Biol. 2000 Feb;79(2):71-80.
SNAREs	SYP31 (AtSED5)	YLR026C	1400588	Hardwick and Pelham	J Cell Biol. 1992 Nov;119(3):513-21.
	SYP32
	SYP41 (AtTLG2a)	YOL018C	10397773	Coe et al	Mol Biol Cell. 1999 Jul;10(7):2407-23.
	SYP42 (AtTLG2b)
	SYP43 (AtTLG2c)
	SYP21 (AtPEP12)	YOR036W	7638178	Bassham et al	Proc Natl Acad Sci U S A. 1995 Aug 1;92(16):7262-6.
	SYP22 (AtVAM3)
	SYP23 (AtPLP)
	KNOLLE (SYP111)	YMR183C*	8223426	Aalto et al	EMBO J. 1993 Nov;12(11):4095-104.
		YPL232W	8223426	Aalto et al	EMBO J. 1993 Nov;12(11):4095-104.
	SYP122 (Synt4)	YMR183C*	8223426	Aalto et al	EMBO J. 1993 Nov;12(11):4095-104.
		YPL232W	8223426	Aalto et al	EMBO J. 1993 Nov;12(11):4095-104.
	SYP123	YMR183C*	8223426	Aalto et al	EMBO J. 1993 Nov;12(11):4095-104.
		YPL232W	8223426	Aalto et al	EMBO J. 1993 Nov;12(11):4095-104.
	SYP124	YMR183C* YPL232W	8223426	Aalto et al	EMBO J. 1993 Nov;12(11):4095-104.
	SYP125		8223426	Aalto et al	EMBO J. 1993 Nov;12(11):4095-104.
	SYP131	YMR183C* YPL232W	8223426	Aalto et al	EMBO J. 1993 Nov;12(11):4095-104.
	SYP132		8223426	Aalto et al	EMBO J. 1993 Nov;12(11):4095-104.
	GOS12	YHL031C	9755865	McNew et al	FEBS Lett. 1998 Sep 11;435(1):89-95.
	VTI13	YMR197C	9398683	Lupashin et al	Mol Biol Cell. 1997 Dec;8(12):2659-76.
	VTI14
	SFT11	YKL006C-A	7596416	Banfield et al	Nature. 1995 Jun 29;375(6534):806-9.
	SFT12
	SYP51	YGL212W	9710615	Sato et al	Mol Cell Biol. 1998 Sep;18(9):5308-19.
	SYP52
	SYP61 (OSM1)	YDR468C	10397773	Coe et al	Mol Biol Cell. 1999 Jul;10(7):2407-23.
	YKT61	YKL196C	9211930	McNew et al	J Biol Chem. 1997 Jul 11;272(28):17776-83.
	YKT62
	VAMP711	YOR327C, YAL030W	8374953	Protopopov et al	Cell. 1993 Sep 10;74(5):855-61.
	VAMP721	YAL030W,YOR327C	8374953	Protopopov et al	Cell. 1993 Sep 10;74(5):855-61.
	TYN11	YBL106C	14718573	Wadskog et al	Mol Biol Cell. 2004 Mar;15(3):1436-44.
	TYN12	YPR032W	16390997	Grosshans et al	J Cell Biol. 2006 Jan 2;172(1):55-66.
	Sec18	YBR080C	3054509	Eakle et al	Mol Cell Biol. 1988 Oct;8(10):4098-109.
	Sec17	YBL050W	1601878	Griff et al	J Biol Chem. 1992 Jun 15;267(17):12106-15.
