# Supplementary material for: The Complexity of Vesicle Transport Factors in Plants Examined by Orthology Search
Source: PLoS One. 2014 May 20;9(5):e97745. doi: 10.1371/journal.pone.0097745 (PMC4028247; doi:10.1371/journal.pone.0097745)
Supplement: Table S23 — Domain architecture of clathrin coated vesicle components in yeast, A. thaliana and S. lycopersicum. (XLS) [file pone.0097745.s025.xls]

## Sheet: Clathrin
Table S14: Domain architecture of Clathrin coated vesicle components in yeast, Arabidopsis and tomato
Complex		Factors	Yeast							Arabidopsis							Tomato
			Id	Domain	Start	End	Pfam Id	E-value		Id	Domain	Start	End	Pfam Id	E-value		Id	Domain	Start	End	Pfam Id	E-value
Triskelion (cage)		Heavy chain	YGL206C	Clathrin_propel	151	189	PF01394.15	6.5e-05		At3g08530	Clathrin_propel	20	56	PF01394.15	3.0e-6		Solyc03g096000	Clathrin_propel	20	56	PF01394.15	6.6e-06
				Clathrin-link	338	360	PF09268.5	8.7e-06			Clathrin_propel	154	197	PF01394.15	8.7e-09			Clathrin_propel	154	197	PF01394.15	2.1e-08
				Clathrin_H_link	362	425	PF13838.1	1.6e-24			Clathrin-link	344	367	PF09268.5	4.7e-10			Clathrin-link	344	367	PF09268.5	1.6e-09
				Clathrin	545	674	PF00637.15	2.5e-18			Clathrin_H_link	369	434	PF13838.1	1.8e-29			Clathrin_H_link	369	434	PF13838.1	2.0e-28
				Clathrin	694	832	PF00637.15	9.5e-23			Clathrin	555	691	PF00637.15	1.5e-21			Clathrin	557	689	PF00637.15	3.3e-21
				Clathrin	840	974	PF00637.15	3.7e-32			Clathrin	701	840	PF00637.15	7.9e-20			Clathrin	701	841	PF00637.15	2.8e-20
				Clathrin	986	1124	PF00637.15	3.9e-33			Clathrin	850	984	PF00637.15	3.5e-32			Clathrin	850	981	PF00637.15	2.7e-30
				Clathrin	1135	1273	PF00637.15	5.2e-30			Clathrin	993	1133	PF00637.15	9.6e-30			Clathrin	993	1133	PF00637.15	2.5e-29
				Clathrin	1280	1423	PF00637.15	9.8e-32			Clathrin	1145	1281	PF00637.15	6.9e-26			Clathrin	1146	1281	PF00637.15	2.1e-26
				Clathrin	1429	1569	PF00637.15	2.0e-31			Clathrin	1289	1432	PF00637.15	1.4e-29			Clathrin	1288	1431	PF00637.15	2.5e-30
											Clathrin	1438	1579	PF00637.15	1.7e-31			Clathrin	1438	1579	PF00637.15	1.8e-32
										At3g11130	Clathrin_propel	20	56	PF01394.15	2.1e-06		Solyc05g052510	Clathrin_propel	20	56	PF01394.15	2.7e-06
											Clathrin_propel	154	197	PF01394.15	8.6e-09			Clathrin_propel	154	197	PF01394.15	2.5e-08
											Clathrin-link	344	367	PF09268.5	4.7e-10			Clathrin-link	344	367	PF09268.5	4.7e-10
											Clathrin_H_link	369	434	PF13838.1	1.8e-29			Clathrin_H_link	369	434	PF13838.1	5.1e-29
											Clathrin	557	691	PF00637.15	6.9e-21			Clathrin	557	689	PF00637.15	4.8e-21
											Clathrin	701	840	PF00637.15	4.6e-20			Clathrin	701	840	PF00637.15	6.4e-20
											Clathrin	850	983	PF00637.15	2.7e-31			Clathrin	850	975	PF00637.15	1.4e-29
											Clathrin	993	1133	PF00637.15	1.2e-29			Clathrin	993	1133	PF00637.15	3.3e-30
											Clathrin	1145	1281	PF00637.15	1.6e-26			Clathrin	1146	1281	PF00637.15	2.9e-26
											Clathrin	1289	1432	PF00637.15	1.4e-29			Clathrin	1288	1431	PF00637.15	7.6e-30
											Clathrin	1438	1579	PF00637.15	1.6e-32			Clathrin	1438	1579	PF00637.15	1.0e-32
																	Solyc06g051310	Clathrin_propel	20	56	PF01394.15	2.7e-06
																		Clathrin_propel	154	197	PF01394.15	2.5e-08
																		Clathrin-link	344	367	PF09268.5	2.0e-8
																		Clathrin_H_link	369	434	PF13838.1	1.8e-29
																		Clathrin	557	689	PF00637.15	7.4e-21
																		Clathrin	701	840	PF00637.15	2.3e-19
																		Clathrin	850	981	PF00637.15	1.5e-30
																		Clathrin	993	1133	PF00637.15	1.5e-30
																		Clathrin	1146	1281	PF00637.15	3.2e-27
																		Clathrin	1288	1431	PF00637.15	5.5e-30
																		Clathrin	1438	1579	PF00637.15	3.6e-33
		Light chain	YGR167W	Clathrin_lg_ch	1	233	PF01086.12	1.8e-65		At2g40060	Clathrin_lg_ch	39	175	PF01086.12	7.1e-13		Solyc09g014450	Clathrin_lg_ch	60	196	PF01086.12	1.3e-08
										At3g51890	Clathrin_lg_ch	5	227	PF01086.12	4.2e-15
Cargo selective	AP1	ϒ	YPR029C	Adaptin_N	21	617	PF01602.15	1.0e-141		At1g60070	Adaptin_N	27	579	PF01602.15	2.7e-140		Solyc04g025870	Adaptin_N	27	579	PF01602.15	3.2e-138
				Alpha_adaptinC2	726	826	PF02883.15	6.7e-14			Alpha_adaptinC2	748	801	PF02883.15	8.9e-11			Alpha_adaptinC2	761	874	PF02883.15	2.5e-31
											Alpha_adaptinC2	834	895	PF02883.15	3.8e-14		Solyc05g005780	Adaptin_N	27	578	PF01602.15	1.8e-140
										At1g23900	Adaptin_N	29	579	PF01602.15	4.3e-146			Alpha_adaptinC2	763	876	PF02883.15	5.9e-31
											Alpha_adaptinC2	760	873	PF02883.15	2.5e-31
		β1/2'	YKL135C	Adaptin_N	26	551	PF01602.15	5.7e-141		At4g11380	Adaptin_N	49	555	PF01602.15	5.5e-166		Solyc08g081320	Adaptin_N	16	533	PF01602.15	1.6e-168
											Alpha_adaptinC2	691	789	PF02883.15	1.3e-10			Alpha_adaptinC2	671	769	PF02883.15	1.7e-08
											B2-adapt-app_C	804	915	PF09066.5	5.6e-29			B2-adapt-app_C	784	895	PF09066.5	9.1e-30
										At4g23460	Adaptin_N	16	533	PF01602.15	2.3e-169
											Alpha_adaptinC2	668	766	PF02883.15	9.0e-10
											B2-adapt-app_C	781	892	PF09066.5	1.0e-28
		μ1	YPL259C	Clat_adaptor_s	49	132	PF01217.15	7.3e-09		At1g60780	Clat_adaptor_s	7	128	PF01217.15	7.1e-08		Solyc05g013340	Clat_adaptor_s	9	129	PF01217.15	4.7e-06
				Adap_comp_sub	164	473	PF00928.16	4.4e-90			Adap_comp_sub	159	426	PF00928.16	6.1e-93			Adap_comp_sub	157	424	PF00928.16	9.4e-91
										At1g10730	Clat_adaptor_s	7	125	PF01217.15	1.0e-7		Solyc06g071650	Clat_adaptor_s	40	119	PF01217.15	2.4e-06
											Adap_comp_sub	159	426	PF00928.16	2.4e-87			Adap_comp_sub	147	414	PF00928.16	1.9e-90
																	Solyc04g026380	Adap_comp_sub	12	233	PF00928.16	1.8e-72
		σ1	YLR170C	Clat_adaptor_s	4	145	PF01217.15	8.5e-61		At2g17380	Clat_adaptor_s	1	140	PF01217.15	5.5e-55		Solyc11g005220	Clat_adaptor_s	1	140	PF01217.15	7.1e-56
										At4g35410	Clat_adaptor_s	1	112	PF01217.15	3.0e-46
	AP2	α	YBL037W	Adaptin_N	38	648	PF01602.15	2.9e-138		At5g22770	Adaptin_N	27	580	PF01602.15	4.3e-113		Solyc06g074650	Adaptin_N	29	582	PF01602.15	2.5e-110
				Alpha_adaptinC2	769	882	PF02883.15	5.2e-09			Alpha_adaptinC2	748	841	PF02883.15	4.0e-19			Alpha_adaptinC2	759	859	PF02883.15	1.0e-13
											Alpha_adaptin_C	856	964	PF02296.11	3.2e-20			Alpha_adaptin_C	867	975	PF02296.11	6.0e-19
										At5g22780	Adaptin_N	27	580	PF01602.15	4.8e-113		Solyc11g066760	Adaptin_N	7	459	PF01602.15	1.4e-99
											Alpha_adaptinC2	748	841	PF02883.15	3.2e-19		Solyc11g066770	Adaptin_N	20	444	PF01602.15	2.2e-99
											Alpha_adaptin_C	856	964	PF02296.11	2.1e-20
		β1/2'	d.a	d.a	d.a	d.a	d.a			d.a	d.a	d.a	d.a	d.a	d.a		d.a	d.a	d.a	d.a	d.a	d.a
		μ2								At5g46630	Adap_comp_sub	167	414	PF00928.16	1.4e-81		Solyc06g061150	Adap_comp_sub	168	439	PF00928.16	1.9e-90
																	Solyc08g006960	Adap_comp_sub	167	438	PF00928.16	3.6e-89
		ϒ2	YJR058C	Clat_adaptor_s	3	146	PF01217.15	2.8e-58		At1g47830	Clat_adaptor_s	1	141	PF01217.15	1.5e-53		Solyc04g081410	Clat_adaptor_s	1	141	PF01217.15	3.4e-53
	AP3	δ	YPL195W	Adaptin_N	46	609	PF01602.15	9.6e-140		At1g48760	Adaptin_N	33	536	PF01602.15	7.1e-84		Solyc03g119270	Adaptin_N	32	495	PF01602.15	2.7e-84
		β3	YGR261C	Adaptin_N	40	621	PF01602.15	1.1e-144		At3g55480	Adaptin_N	38	639	PF01602.15	2.4e-99		Solyc06g043030	Adaptin_N	38	640	PF01602.15	2.7e-106
		μ3								At1g56590	Adap_comp_sub	167	414	PF00928.16	9.2e-66		Solyc01g100820	Adap_comp_sub	167	414	PF00928.16	1.8e-61
		σ3	YJL024C	Clat_adaptor_s	1	159	PF01217.15	8.8e-60		At3g50860	Clat_adaptor_s	1	146	PF01217.15	9.5e-49		Solyc01g109640	Clat_adaptor_s	1	146	PF01217.15	1.0e-46
																	Solyc02g085240	Clat_adaptor_s	1	147	PF01217.15	4.1e-47
	AP4	ε								At1g31730	Adaptin_N	55	594	PF01602.15	1.2e-80		Solyc08g075310	Adaptin_N	40	581	PF01602.15	5.1e-83
		β4								At5g11490	Adaptin_N	36	551	PF01602.15	7.4e-97		Solyc08g068210	Adaptin_N	33	551	PF01602.15	7.2e-99
											B2-adapt-app_C	725	836	PF09066.5	3.7e-28			B2-adapt-app_C	724	835	PF09066.5	4.2e-25
		μ4								At4g24550	Clat_adaptor_s	2	133	PF01217.15	9.8e-08		Solyc04g076230	Clat_adaptor_s	5	132	PF01217.15	6.1e-05
											Adap_comp_sub	183	378	PF00928.16	3.5e-53			Adap_comp_sub	182	452	PF00928.16	5.9e-73
		σ4								d.a	d.a	d.a	d.a	d.a	d.a		d.a	d.a	d.a	d.a	d.a	d.a
